# Supplementary material for: Organic charge-transfer complexes for the selective accommodation of aromatic isomers using anthracene derivatives and TCNQ
Source: Royal Society of Chemistry journal article supplement (doi:10.1039/c5nj03442f), 2016-01-01
Supplement: c5nj03442f1.pdf [file c5nj03442f1.pdf]

# Organic Charge Transfer Complexes for Selective Accommodation of Aromatic Isomers Using Anthracene Derivatives and TCNQ

Arshad Khan<sup>a</sup>, Mingliang Wang<sup>a\*</sup>, Rabia Usman<sup>a</sup>, Jiao Lu<sup>a</sup>, Hao Sun<sup>a</sup>, Man Du<sup>a</sup>, Ruimin Zhang<sup>a</sup>, , Chunxiang Xu<sup>b\*</sup>

<sup>†</sup> School of Chemistry and Chemical Engineering, Southeast University, Nanjing 211189, P. R. China

<sup>‡</sup> State Key Laboratory of Bioelectronics, Southeast University, Nanjing 210096, P. R. China

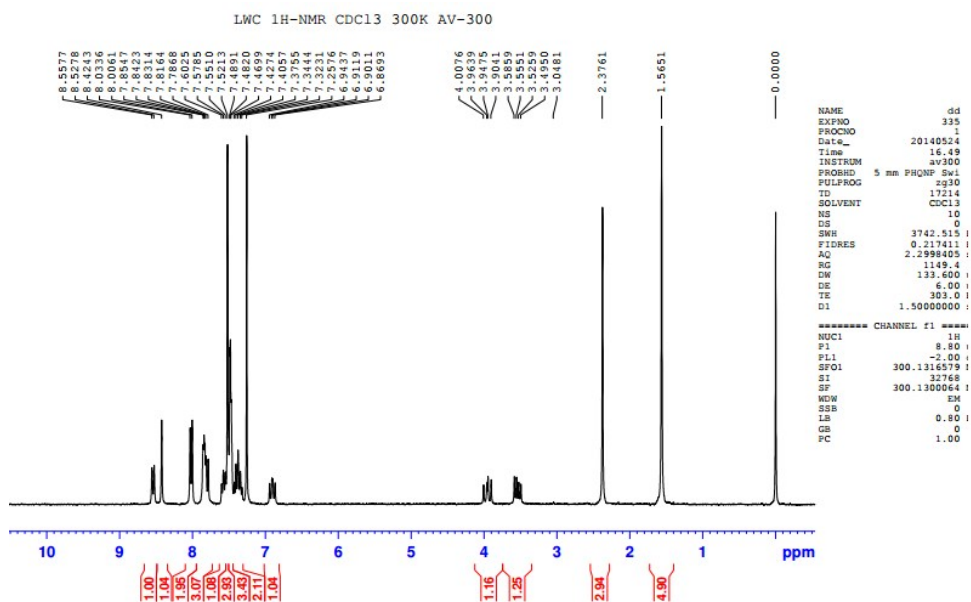

Figure S1.  $^1\text{H}$  NMR spectra of crystal Ct1

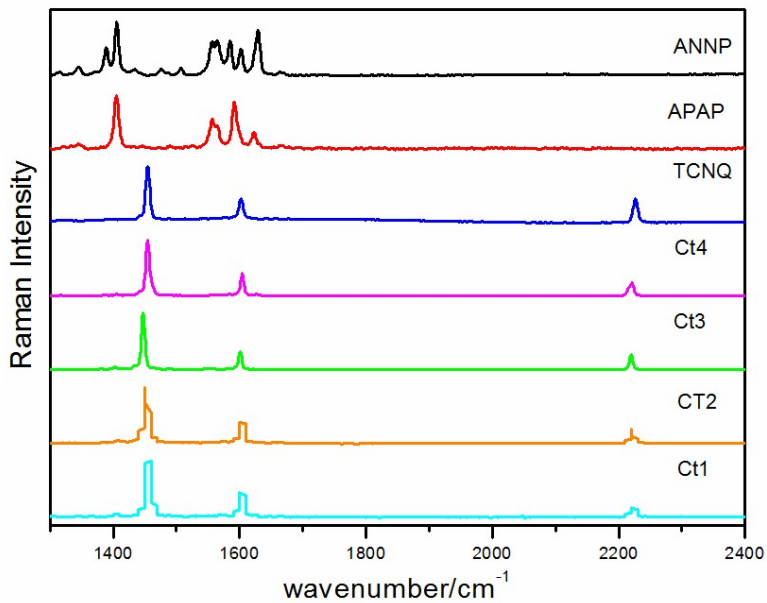

Figure S2. Raman spectra of crystal Ct1-Ct4

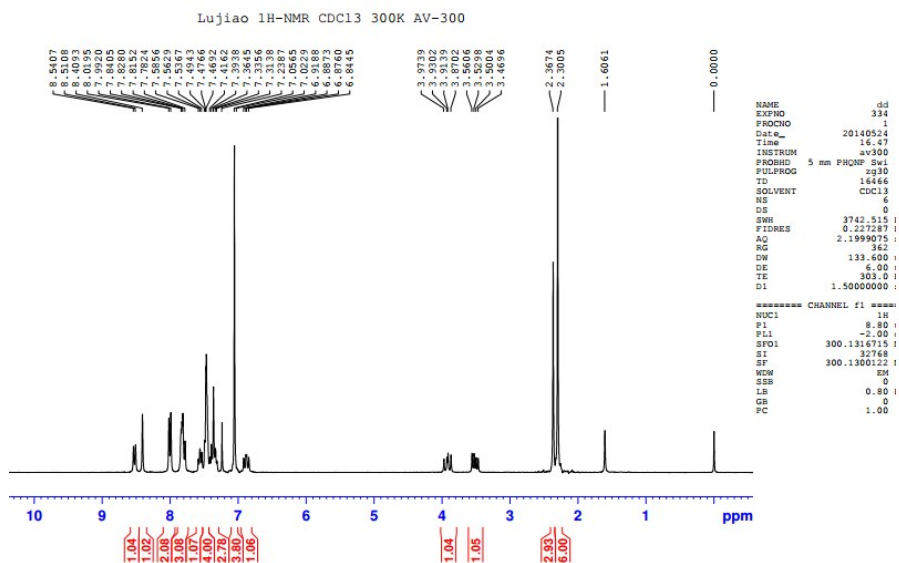

Figure S3.  $^1\text{H}$  NMR spectra of crystal Ct1.pX
